RESEARCH ARTICLE

# Cloning and Functional Analysis of *Pax6* from the Hydrothermal Vent Tubeworm *Ridgeia piscesae*

Huifang Yuan<sup>1</sup>, Wei Wang<sup>1</sup>\*, Bin Hu<sup>1</sup>, Changkun Pan<sup>1,2</sup>, Mingliang Chen<sup>1</sup>, Linlin Ke<sup>1</sup>, Lirong Yang<sup>1</sup>, Jianming Chen<sup>1</sup>\*

**1** Key Laboratory of Marine Biogenetic Resources, Third Institute of Oceanography, State Oceanic Administration, Xiamen, Fujian Province, China, **2** School of Marine Sciences, Ningbo University, Ningbo, Zhejiang, China

\* These authors contributed equally to this work.

\* [chenjm@xmu.edu.cn](mailto:chenjm@xmu.edu.cn) (JC); [wangw.sz@tio.org.cn](mailto:wangw.sz@tio.org.cn) (WW)

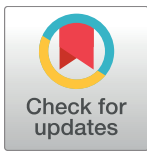

**OPEN ACCESS**

**Citation:** Yuan H, Wang W, Hu B, Pan C, Chen M, Ke L, et al. (2016) Cloning and Functional Analysis of *Pax6* from the Hydrothermal Vent Tubeworm *Ridgeia piscesae*. PLoS ONE 11(12): e0168579. doi:10.1371/journal.pone.0168579

**Editor:** Hector Escriva, Laboratoire Arago, FRANCE

**Received:** May 10, 2016

**Accepted:** December 2, 2016

**Published:** December 22, 2016

**Copyright:** © 2016 Yuan et al. This is an open access article distributed under the terms of the [Creative Commons Attribution License](https://creativecommons.org/licenses/by/4.0/), which permits unrestricted use, distribution, and reproduction in any medium, provided the original author and source are credited.

**Data Availability Statement:** All relevant data are within the paper.

**Funding:** This work was supported by the Scientific Research Foundation of Third Institute of Oceanography (SOA, grant: 2015001), the China Ocean Mineral Resources R & D Association (COMRA, grants: DY125-22-QY-05 and DY-125-15-T-08), the Natural Science Foundation of China (grants: 31271567 and 31272684), the Fujian Marine Hi-tech Industry Program (grant: 2014-05), and the Aquatic Sanxin Engineering Project of Jiangsu Province (grant: D2015-11-5). The funders had no role in study design, data collection and

## Abstract

The paired box 6 (*Pax6*) gene encodes a transcription factor essential for eye development in a wide range of animal lineages. Here we describe the cloning and characterization of *Pax6* gene from the blind hydrothermal vent tubeworm *Ridgeia piscesae* (*RpPax6*). The deduced *RpPax6* protein shares extensive sequence identity with *Pax6* proteins from other species and contains both the paired domain and a complete homeodomain. Phylogenetic analysis indicates that it clusters with the corresponding sequence from the closely related species *Platynereis dumerilii* (*P. dumerilii*) of Annelida. Luciferase reporter assay indicate that *RpPax6* protein suppresses the transcription of *sine oculis* (*so*) in *D. melanogaster*, interfering with the C-terminal of *RpPax6*. Taking advantage of *Drosophila* model, we show that *RpPax6* expression is not able to rescue small eye phenotype of *ey*<sup>2</sup> mutant, only to cause a more severe headless phenotype. In addition, *RpPax6* expression induced apoptosis and inhibition of apoptosis can partially rescue *RpPax6*-induced headless phenotype. We provide evidence *RpPax6* plays at least two roles: it blocks the expression of later-acting transcription factors in the eye development cascade, and it promotes cell apoptosis. Our results indicate alternation of the *Pax6* function may be one of the possible causes that lead the eye absence in vestimentiferan tubeworms.

## Introduction

Members of the paired box (*Pax*) gene family encode transcription factors that are characterized by a DNA-binding paired domain of 128 amino acids located at the amino terminal end [1]. Additionally, some *Pax* proteins contain a partial or complete paired-type homeodomain and/or an octapeptide motif. Members of the *Pax* gene family are involved in the regulation of wide range of developmental processes, including segmentation and organogenesis [2, 3]. *Pax6* is one of the well-characterized *Pax* genes which plays critical role in eye development in diverse animal lineages. It contains both a paired and a complete homeodomain. The genomic organization, domain sequences, and function are highly conserved [4, 5].

analysis, decision to publish, or preparation of the manuscript.

**Competing Interests:** The authors have declared that no competing interests exist.

Mutations in the *Pax6* gene cause aniridia (a panocular disorder primarily characterized by complete or partial absence of iris tissue) in human and small eye (*sey*) phenotype (microphthalmia and small body size) in mouse [6, 7]. Mutations in the *Drosophila Pax6* homolog eyeless (*ey*) cause partial to complete loss of the compound eye as well as surrounding sensory bristles. Moreover, misexpression of *Pax6* genes from many divergent species including *Drosophila* [8], ribbon worm [9], squid [10] and ascidian [11] induce ectopic eyes in *Drosophila*. In frogs, *Pax6* misexpression can also induce ectopic eyes [12]. The conservation of regulatory cascade required for eye morphogenesis is further supported by the fact that *eya-Eya*, *so-Six*, and atonal-*Ath5* gene families all act immediately downstream of *Pax6* in both fruit fly and mouse eye development [13–16], indicating the *Pax6* dependent eye developmental pathway can be traced at least in the last common ancestor of protostome and deuterostome (urbilateria) and has been adapted to the control of development of different visual systems found in both clades.

The comparative analyses of bilaterian eyes have revealed that the simplest morphology comprises one photoreceptor cell and one pigment cell [17]. In Annelida, two distinct types of pigmented cerebral eyes were characterized: larval and adult eyes. Adult annelid eyes are multicellular, whereas larval annelid eyes are comparatively simple, usually only comprising of two cells: one rhabdomeric photoreceptor cell and one pigment cell. Larval-type eyes match the prototypical two-celled eye and are present in larvae of species of many protostomian lineages [18, 19, 20] as well as deuterostomian lineages including hemichordates [21] and cephalochordates [22]. The larval eyes are usually replaced by the eyes of the adults during later development [23–26]. The adult multicellular eyes show a very characteristic structure with photoreceptor cell processes traversing the pigment cell layer. This type of eyes is found widespread in various protostomian lineages including polychaetes [23, 27], molluscs [28], sipunculans [29] and onychophorans [30]. Both larval and adult eyes are molecularly characterized in the marine annelid *Platynereis dumerilii*. *Pax6* was found to be expressed in the larval but not adult eyes of *P. dumerilii* [23].

Based the resemblance to the fossilized tubes, modern vestimentifera tubes old as 430 million years form a derived clade of vestimentifera within the annelid radiation.” [31]. Vestimentiferans are important members of deep-sea chemosynthetic communities, which include hydrothermal vents, cold seeps, whale falls and reduced sediments. Due to their deep-sea habitats the first member of vestimentifera *Siboglinum weberi* was not reported until early in the 20th century [32]. More than 100 species of vestimentiferans, have been described. Like many deep-sea organisms as well as cave-dwelling animals, the vestimentiferans tubeworms lack eyes. They rely on microbial endosymbionts for their energetic needs. Vestimentiferan tubeworms have been extensively studied though research has focused primarily on phylogeny and bacterial symbionts [33–35]. Far fewer studies have explored the molecular machinery used in the regulation of development and innate immune system.

To further our understanding of the biomolecular mechanisms underlying the eye absence in vestimentifera lineage, we isolated *Pax6* gene of vestimentiferan *Ridgeia piscesae*. *R. piscesae* is the foundation specie in many Juan de Fuca Ridge hydrothermal vent communities [36, 37]. In order to investigate the function of the *RpPax6*, the model organism *D. melanogaster* was applied for genetic analysis. *D. melanogaster* is accessible for a broad range of genetic and molecular techniques and has been widely used for the elucidating the function of *Pax6* from various species. *RpPax6* protein is found to be able to suppresses the transcription of *sine oculis* (*so*) which can interfere with the activation of eye development network. In addition *RpPax6* is associated with the elevated level of apoptosis. Our results suggest that functional alternation of *RpPax6* may be involved in the eye absence in vestimentiferan tubeworms.

## Materials and Methods

### cDNA cloning of *R. piscesae* Pax6

The cDNA library of *R. piscesae* was previously constructed [38]. Sequences of cDNA clones were analyzed and a clone bearing putatively entire ORF of Pax6 was identified. To obtain the full length cDNAs of Pax6 gene, the 3' and 5' ends were obtained by rapid amplification of cDNA ends (RACE) approaches using 3' -Full RACE Core Set with PrimeScript™ RTase and 5' -Full RACE Kit with TAP (TaKaRa, Japan) following the manufacturer's instructions. The PCR products were ligated into pMD-19T vector (TaKaRa, Japan) and transformed into the competent *E. coli* TOP10 cells. Positive clones with the expected-size inserts were determined by colony PCR and DNA sequencing.

### Phylogenetic analysis

Accession numbers for sequences included in the analyses are: *Doryteuthis opalescens* Pax6 (*DoPax6*): AAB40616; *Euprymna scolopes* Pax6 (*EsPax6*): AAM74161; *Crassostrea gigas* Pax6 (*CgPax6*): XP\_011433289; *Idiosepius paradoxus* Pax6 (*IpPax6*): BAM74253; *Ambystoma mexicanum* Pax6 (*AmPax6*): AAD50903; *Anolis carolinensis* Pax6 (*AcPax6*): XP\_008104750; *Cavia porcellus* Pax6 (*CpPax6*): XP\_003464531; *Aotus nancymaae* Pax6 (*AnPax6*): XP\_012307699; *Xenopus laevis* Pax6 (*XlPax6*): AF154555; *Homo sapiens* Pax6 (*HsPax6*): NP\_000271; *Platyneris dumerilii* Pax6 (*PdPax6*): CAJ40659; *Terebratalia transversa* Pax6 (*TtPax6*): ADZ24784; *Lottia gigantea* Pax6 (*LgPax6*): XP\_009066032; *Cupiennius salei* Pax6 (*CsPax6*): CEH19758; *Saccoglossus kowalevskii* Pax6 (*SkPax6*): NP\_001158383; *Limulus polyphemus* Pax6 (*LpPax6*): XP\_013778820; *Drosophila melanogaster eyeless* (*DmEy*): AAF59318; *Mus musculus* Pax2 (*MmPax2*): CAA39302.1. The amino acid sequences of Pax proteins were aligned and a phylogenetic tree was generated using the Mega 3 [39]. The neighbor joining method with 1000 bootstrap replications was used.

### Fly stocks

The following fly stocks were used:

*y w*;+/+;*ey-GAL4/TM6B,Tb*

*y w*;+/+;*GMR-GAL4*

*y w*;+/+;*dpp-GAL4/TM6B,Tb*

*y w*;+/+;*da-GAL4*

*y w*;+/+;*da-GAL4,tub-GAL80<sup>ts</sup>*

*y w*;+/+;*UAS-RpPax6*

*y w*;+/+;*UAS-ey*

*y w*; *UAS-P35/cyo,y+;FRT-82B*

*y w*;+/+;*cyo*

*y w*;+/+;+/+*TM6B,Tb*

*w t*; *ey*<sup>2</sup>

*y w*;+/+;*UAS-mPax6/Tm3;ey*<sup>2</sup>

## Construction of plasmids

We constructed a set of chimeric molecules in which individual segments of *ey* were deleted and replaced with the corresponding region of RpPax6. The *eyN+RpPax6C* chimera was created by replacing the N terminal of RpPax6 with amino acids 1–471 of *ey*. The *eyPD+RpPax6HD* chimera was created by replacing the PD of RpPax6 with amino acids 36–164 of *ey*. Similarly, we generated a set of chimeric molecules in which individual segments of RpPax6 were deleted and replaced with the corresponding region of *ey*. The *RpPax6PD+eyHD* chimera was created by replacing the PD of *ey* with amino acids 17–143 of RpPax6. The *RpPax6N+eyC* chimera was generated by replacing the N terminal segment of *ey* with amino acids 1–296 of RpPax6.

The firefly luciferase reporter plasmid (pGL3-so and pGL3-*eya*) were constructed by inserting the 428 bp of *so10* and a 398 bp of *so5* fragments [13] and -499 to +100 fragment *eya* gene promoter region PCR amplified from the *Drosophila* genome in pGL3-basic vector (Promega, America) at *Kpn* I and *Xho* I sites. The plasmid pUAST-RpPax6 was generated by subcloning the RpPax6 cDNA into the *Drosophila* transformation vector pUAST using *Eco*R I and *Xho* I. The transgenes encoding wild-type and mutated RpPax6 and *ey* proteins were constructed as follows: pCMV-myc-RpPax6, pCMV-myc-*ey*, pCMV-myc-RpPax6N+*eyC*, pCMV-myc-*eyN*+RpPax6C, pCMV-myc-*eyPD*+RpPax6HD, pCMV-myc-RpPax6PD+*eyHD* were prepared by subcloning the inserts from the corresponding pEASY-T5 vectors into vector pCMV-myc plasmid (Clontech, Japan) using *Eco*R I and *Xho* I. Several transgenic lines of each construct were obtained by P-element-mediated germline transformation according to standard procedures. All of the constructs were confirmed by DNA sequencing.

## Temperature-shift experiments

Conditional expression of RpPax6 was carried out by using *y w; +/+; UAS-RpPax6/da-GAL4, tub-GAL80<sup>ts</sup>* line. GAL80<sup>ts</sup> is a temperature sensitive form of the GAL80 repressor. At 25°C degrees, the GAL80<sup>ts</sup> represses the activity of GAL4; however, when the temperature is shifted to 29°C degrees, the GAL80<sup>ts</sup> is inactivated, allowing for the GAL4 transcription factor to bind to the UAS binding sites and express the gene of interest [40]. Larvae were raised at 18°C (GAL80<sup>ts</sup> permissive temperature) for 120 h then shift to 29°C (GAL80<sup>ts</sup> restrictive temperature) for 24 h. Twenty third instar larva were collected. Larger discs (including the wing and eye-antenna discs) were dissected and incubated for 5 minutes in 5 g/mL acridine orange in phosphate-buffered saline (PBS) [41]. The organs were then placed in fresh PBS and analyzed immediately for nuclear staining on a Leica M165FC fluorescence stereomicroscope (Leica, Wetzlar, Germany). Independent triplicate experiments were performed.

## Luciferase assays

Transient transfections of 293T cells were performed in 24-well plates with the transfection reagent Lipofectamine 2000 (Invitrogen, America). For each well, cells were transfected with 100 ng of pSV- $\beta$ -galactosidase (Promega, America) as transfection efficiency control, 200 ng reporter vector (pGL3-so) and 200 ng expression vector (pCMV-myc-RpPax6, pCMV-myc-*ey*, pCMV-myc-RpPax6N+*eyC*, pCMV-myc-*eyN*+RpPax6C, pCMV-myc-*eyPD*+RpPax6HD, pCMV-myc-RpPax6PD+*eyHD* or pCMV-myc). pCMV-myc vector was used as a negative control. At 6 h post-transfection the medium was replaced. Cells were harvested 30 h after transfection, rinsed with PBS, resuspended in reporter cell lysis buffer (Promega, America), and incubated for 10 minutes at room temperature. The lysate was centrifuged at 12,000  $\times$  g for 5 min to pellet the cell debris. The supernatants were transferred to a fresh tube. A 10  $\mu$ L aliquot of the extract was added to 25  $\mu$ L of the luciferase assay substrate (Promega, America)

and the luminescence of the samples were read immediately on a Glomax™ 20/20 Luminometer (Promega, America). Each transfection was performed in triplicate.

β-Galactosidase activity was used for normalizing the transfection efficiency and protein input. A 10 μL-aliquot of the cell extract was mixed with 290 μL of O-nitrophenyl-β-D-Galactopyranoside (ONPG) solution (880 μg/ml ONPG, 67 mM Na<sub>3</sub>PO<sub>4</sub>, 1 mM MgCl<sub>2</sub>, 45 mM β-mercaptoethanol, pH 7.5) (Sangon Biotech, Shanghai). The absorbance of the mixture was determined at 420 nm after 30 min of incubation at 37°C. Each transfection was performed in triplicate. Results are expressed as means of the ratio between firefly luciferase activity and β-Galactosidase activity whereas control is 100%.

## Results

### Cloning and phylogenetic analysis *RpPax6*

Analyses of the cDNA library from long-skinny *Ridgeia piscesae* identified a putative Pax6 gene. The cloned full length Pax6 cDNA contained 312 bp of 5' untranslated region (UTR), 1410 bp of open reading frame (ORF) encoding 470 amino acids, and 650 bp of 3' UTR. The predicted protein product contains the paired domain and a complete homeodomain, but not an octapeptide, exhibiting the structural features characteristic of the Pax6 protein [5]. Therefore, we designated this gene *RpPax6* (*R. piscesae* Pax6). The nucleotide and amino acid sequences have been assigned to the GenBank Accession Number KT380855.

Amino acids sequence alignment of *RpPax6* and the *pax6* from different species reveal that the paired domains and homeodomains are highly conserved (Fig 1). Positions of Pax6 specific amino acids in the conserved domain [5] are conserved in *RpPax6* except one amino acid change. Typical of most paired domains found in Pax6 genes have an asparagine at position 128. However, *RpPax6* encode a threonine at this position. The C-terminal region (C) comprises 152 aa, rich in serine (18%), proline (13%) and asparagine (6%), and contains conserved termination motif. Phylogenetic tree based on full-length Pax6 amino acid sequences was constructed with neighbor joining method (Fig 2). *DmEy* from *D. melanogaster* branched out at the base of the tree other Pax6 proteins were divided into two clades, corresponding protostome and deuterostome respectively. The clade of protostomian lineage comprises two subclades. Pax6 from lophotrochozoan species form a monophyletic subclade. Among this group the identified *RpPax6* clusters with the corresponding sequence from the closely related species *P. dumerilii* of Annelida. The sequences from arthropoda species form the sister group of lophotrochozoan subclade. In the deuterostome clade all vertebrate members of Pax6 gathered together whereas Pax6 from hemichordate *S. kowalevskii* (*SkPax6*) branch out independently at the basal place.

### *RpPax6* has repressive effect on the promoter activity of *so*

*RpPax6* shares 91.4% and 88.3% identity at the paired domain and homeodomain with the ortholog of *Drosophila ey* at the amino acid level. *Drosophila ey* protein has been known as a critical regulator of early retinal development and *sine oculis (so)* is the direct target of *ey* [42]. In addition the eye-specific enhancer of *eya* is known to be induced in response to ectopic expression of *ey* [43]. To test if *RpPax6* is involved in the transcriptional regulation of *ey* downstream target, we examined the effect of *RpPax6* and *ey* proteins with or without mutation on the transcriptional activity of *so* and *eya*. Reporter vectors (pGL3-*so* and pGL3-*eya*) were constructed by cloning *so* and *eya* promoters upstream of a luciferase reporter. 293T cells were transfected with luciferase reporter vector and an expression vector bearing chimeric *ey* and *RpPax6* constructs. As demonstrated in Fig 3, neither *ey*, *RpPax6* or chimeric fusion proteins has significant effect on the promoter activity of pGL3-*eya*, suggesting that *ey* acts through



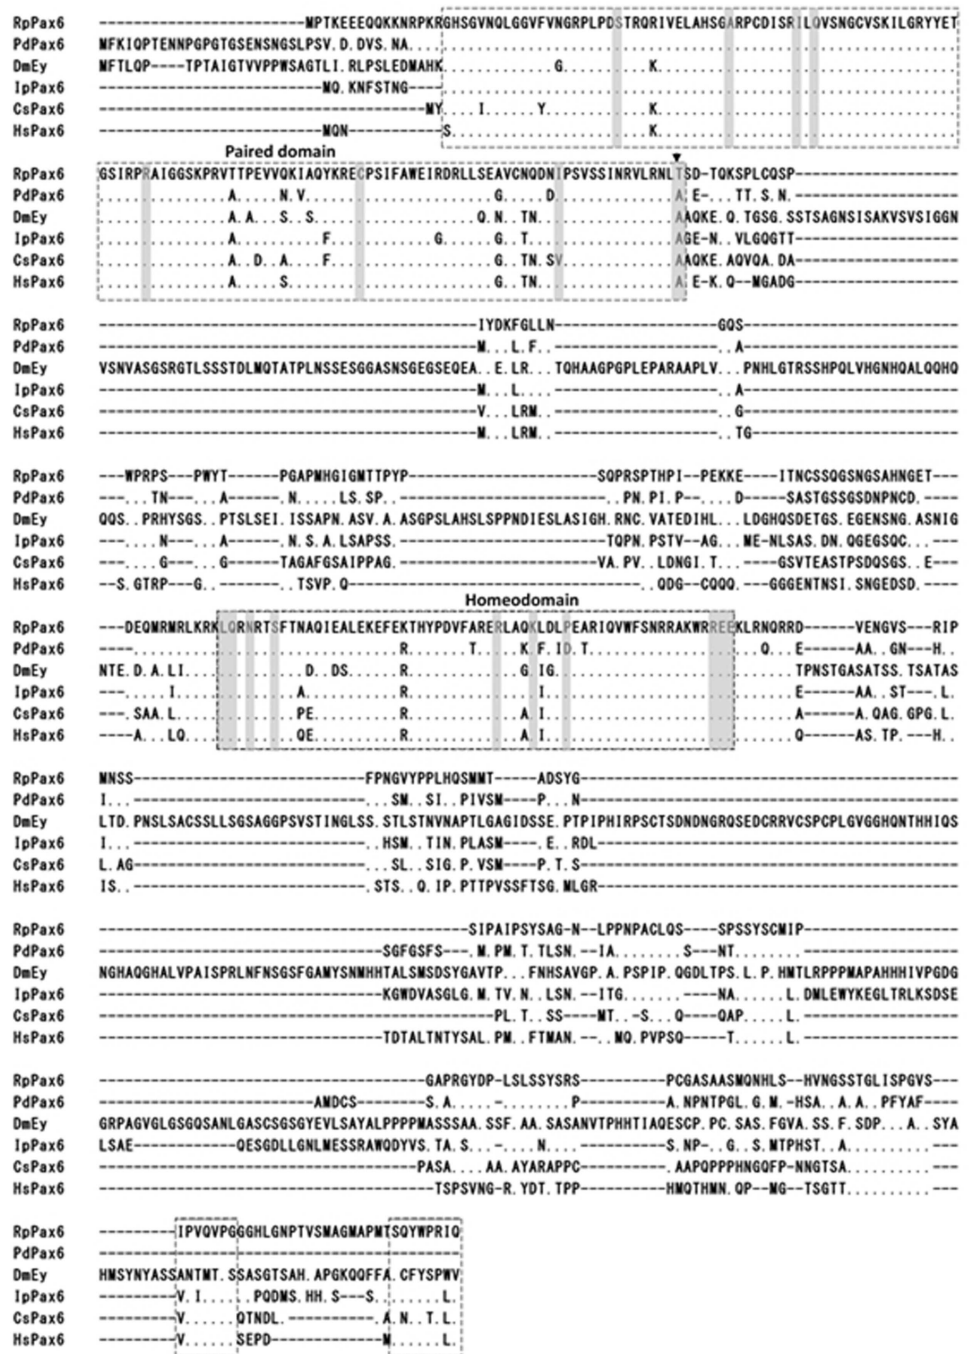

**Fig 1. Comparison of amino acid sequences of Pax6 genes.** Identical amino acids are indicated by dots. The introduced gaps are indicated by dashes. The paired domain, homeodomain and conserved C-terminal motif are boxed. Pax6-specific amino acids [5] are shaded. Arrowhead indicates a single amino acid change of the Pax6-specific amino acids.

doi:10.1371/journal.pone.0168579.g001

other factors to regulate *eya*. Meanwhile, cotransfection of the expression vector pCMV-myc-*eya* and the pCMV-myc-RpPax6PD+*eya*HD with the report construct pGL3-so resulted in two-fold increase in the luciferase activity as compared with the level observed when

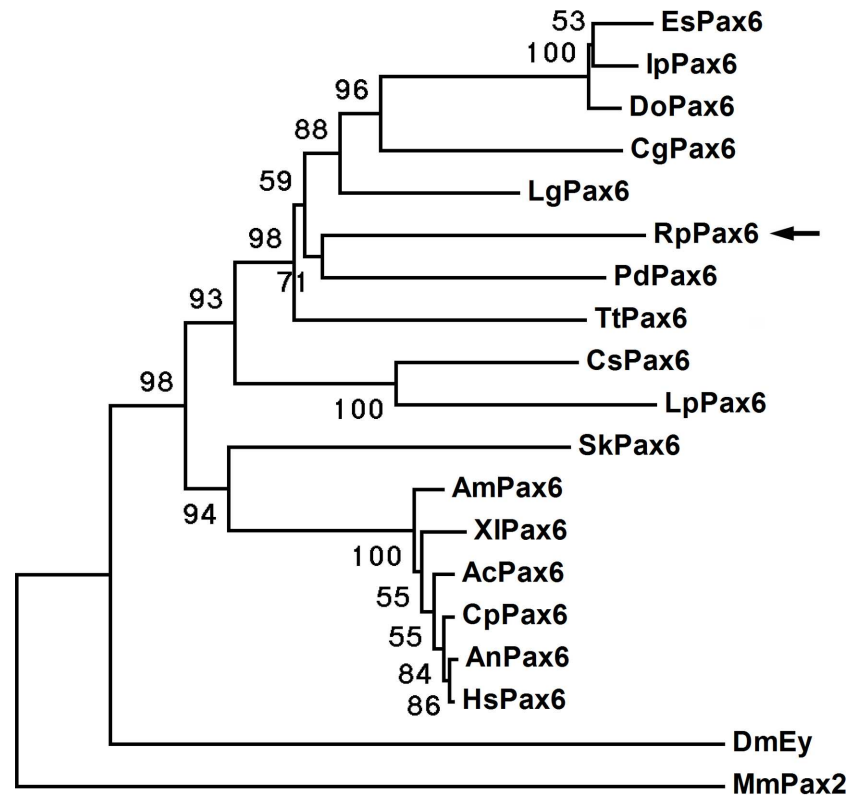

**Fig 2. Phylogenetic position of *RpPax6*.** A neighbor-joining tree based on a comparison of the deduced amino acid sequences of full-length clones of *Pax6* with mouse Pax2 included as outgroup. Numbers at nodes indicate the levels of bootstrap support based on data for 1,000 replicates; only values greater than 50% are shown. Bar 5% estimated sequenced divergence.

doi:10.1371/journal.pone.0168579.g002

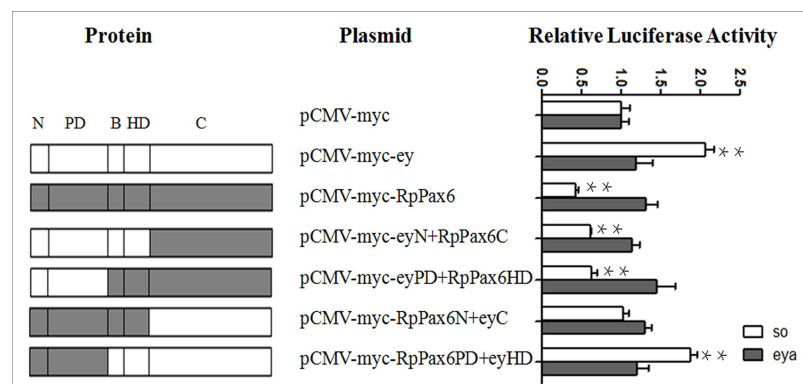

**Fig 3. Structural-functional analysis of *ey* and *RpPax6*.** Schematic summaries of the original and chimeric constructs are listed in the left column. The right column shows the effect of *ey* and *RpPax6* proteins with or without mutation on promoter activity of pGL3-so and pGL3-eya. The assay was carried out in 293T cells as described in Materials and Methods. Luciferase activities are shown relative to those of pCMV-myc. pSV-β-galactosidase was included in transfection as an internal control of the transfection efficiency. The values are the means from three independent experiments ±SE. \*\*P < 0.01.

doi:10.1371/journal.pone.0168579.g003

cotransfecting with control pCMV-myc plasmid, indicating that *so* promoter was activated by *ey* and *RpPax6PD+eyHD*. In contrast the expression of *RpPax6*, *eyN+RpPax6C* and *eyPD+RpPax6HD* resulted in significant suppression of luciferase activity, indicating *RpPax6* and *eyN+RpPax6C* *eyPD+RpPax6HD* have repressive effect on the promoter activity of *so*. Compared with the full-length *RpPax6*, *RpPax6* with paired domain swapped with the corresponding portion of *ey* (*eyN+RpPax6C* and *eyPD+RpPax6HD*) had a much lesser effect on *so* promoter. In the case of *RpPax6* with C region replaced by the counterpart of *ey*, the repressive effect of *RpPax6* was not detected. These results indicate that *RpPax6* protein suppresses the transcription of *so* and the C region of *RpPax6* plays crucial role in the repressive activity.

### Ectopic expression of *RpPax6* in *D. melanogaster*

The GAL4/UAS binary system was used to drive the expression of *RpPax6* in various *Drosophila* tissues. Four GAL4 drivers including *eyeless-GAL4* (*ey-GAL4*), *GMR-GAL4*, *decapentaplegic-GAL4* (*dpp-GAL4*), and *daughterless-GAL4* (*da-GAL4*) were employed (Table 1). The *ey-GAL4* driver line expresses GAL4 ubiquitously in the eye-antenna discs throughout early larval development when all the cells are proliferating. During the third instar larval stage, the expression is restricted to the cycling cells anterior to the morphogenetic furrow [8, 44]. *GMR-GAL4* expresses behind the morphogenetic furrow in the eye disc. *dpp-GAL4* directs GAL4 expression in all of the imaginal discs throughout development, and in only a limited portion of each disc [45]. *da-GAL4* is used to express GAL4 ubiquitously. We observed early lethality in flies expressing *RpPax6* under the control of all four GAL4 driver lines. Global expression of the *RpPax6* using *da-GAL4* leads to embryonic lethality. Expression of *RpPax6* using *dpp-GAL4* caused lethality during larval and pupal stages. Dissection of the pupae showed the animals could not start metamorphosis of the eyes, wings and legs. Expression of *RpPax6* using *ey-GAL4* exhibits pupal lethality. Examination of these dead pharate adults in the pupal case revealed that most head structures and both eyes were missing (Fig 4D). Dissection of the third instar larvae showed abnormal morphology of eye-antennal discs (Fig 5C). Expression of *RpPax6* using *GMR-GAL4* results pupal lethality with eclosion rate of 7.9%. The pharates and adults show rough eye phenotype with a relatively normal eye size and severe ommatidia loss (Fig 4C).

To delineate the function of *RpPax6* the *Drosophila Pax6* homologue gene *ey* was expressed using *dpp-GAL4* and *ey-GAL4*. The result show that expression of *ey* with *dpp-GAL4* leads to significant pupal lethality. Flies dissected from the pupal case show the formation of ectopic eyes on wings, legs and head. Expression of *ey* with *ey-GAL4* produced pink eyes with non-uniformly reduced size. As shown in Fig 4G and 4H, the left eye of the fly was significantly reduced in size whereas the right eye was slightly reduced.

### *RpPax6* expression induced apoptosis

Expression of *RpPax6* using *ey-GAL4* cause abnormal eye-antennal disc, defects in the head region, and death during the pupal stage. The reduced size of the fly head could be due to cell

**Table 1. Phenotypes associated with ectopic expression of *ey* and *RpPax6*.**

|            | <b>ey-GAL4</b>                                                                                                              | <b>GMR-GAL4</b>                                                       | <b>dpp-GAL4</b>                                                               | <b>da-GAL4</b>          |
|------------|-----------------------------------------------------------------------------------------------------------------------------|-----------------------------------------------------------------------|-------------------------------------------------------------------------------|-------------------------|
| Expression | Eye                                                                                                                         | Behind the morphogenetic furrow in the eye disc.                      | Limited portion of in all of the imaginal discs                               | Ubiquitously            |
| UAS-ey     | Pink eyes with non-uniformly reduced size(Fig 4G and 4H)                                                                    |                                                                       | Pupal lethal (100%) Ectopic eyes on wings, Legs and head(Fig 4E).             |                         |
| UAS-RpPax6 | Pupal lethal (100%) Abnormal eye-antennal discs in third instar stage (Fig 5C). Headless phenotype in dead pharate (Fig4D). | Pupal lethality (92.1%) rough eye and severe ommatidia loss (Fig 4C). | Larval and pupal lethal (100%) Under development in the eyes, wings and legs. | Embryonic lethal (100%) |

doi:10.1371/journal.pone.0168579.t001



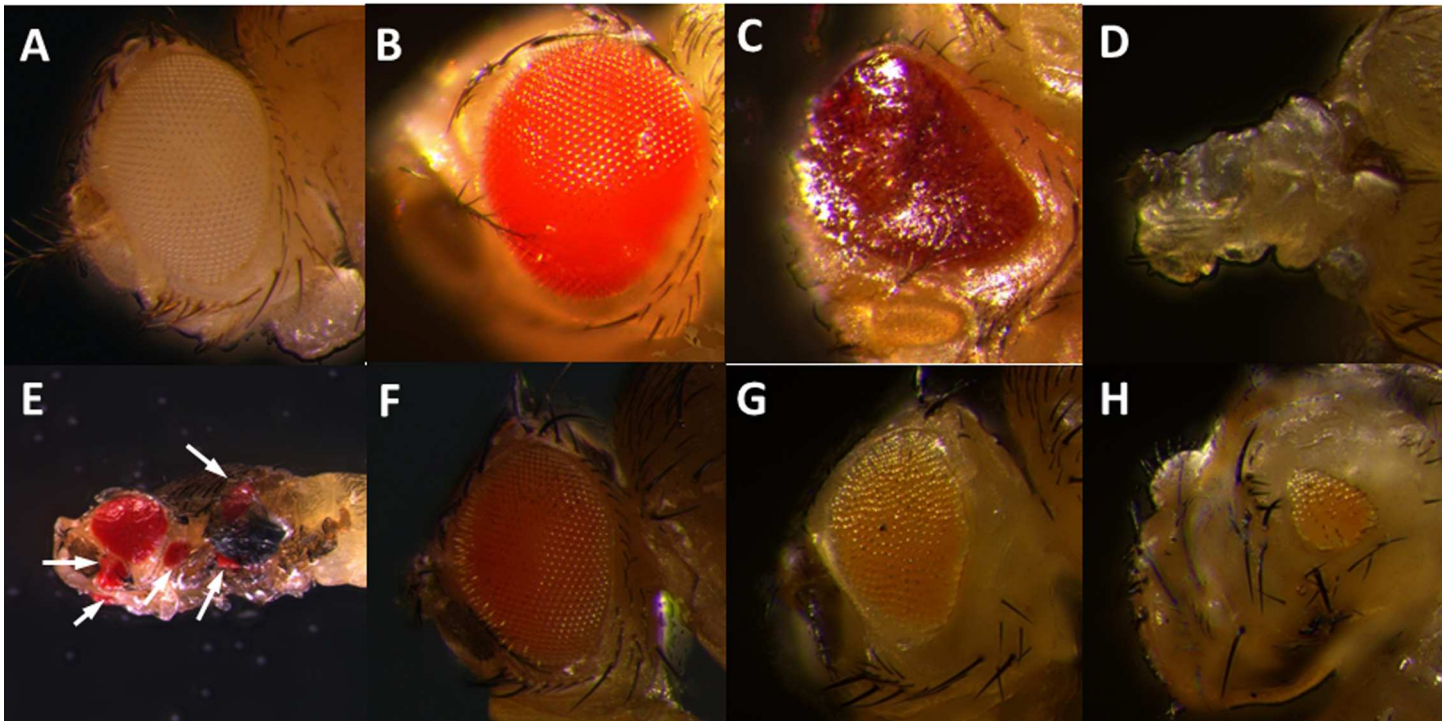

**Fig 4. Eye phenotypes caused by misexpression of *RpPax6* and *ey* genes.** (A, B) head of *y w* and *UAS-RpPax6* pharate. (C) Rough eye in a *UAS-RpPax6/GMR-GAL4* pharate. (D) *UAS-RpPax6/ey-GAL4* pharate with most head structures and both eyes absent. (E) Ectopic eyes in *UAS-ey/dpp-GAL4* fly (arrows). (F) Head of *UAS-ey* pharate. (G, H) Right and left eye of *UAS-ey/ey-GAL4* pharate. The left eye was significantly reduced in size and the right eye was slightly reduced.

doi:10.1371/journal.pone.0168579.g004

death induced by *RpPax6*. This is supported by the observation that throughout expression of *RpPax6* with *da-GAL4* caused earlier and more severe lethality than restricted expression with *ey-GAL4*, *GMR-GAL4* and *dpp-GAL4* (Table 1). To investigate the effects of *RpPax6* expression to the cell death, *y w; +/+; UAS-RpPax6* stock was crossed to the line *y w; +/+; da-GAL4, tub-GAL80<sup>ts</sup>*. The cross was reared at 18°C for 120 h to ensure tight suppression of *RpPax6* expression until third instar stage. And then *RpPax6* was induced by 29°C temperature shift to inactivate GAL80 and subsequently activate Gal4 activity. The third instar larval wing and eye-antenna discs were examined by using acridine orange staining, a vital dye that preferentially labels apoptotic cells [41]. Larva with temperature shift-up had higher level of dying cells in

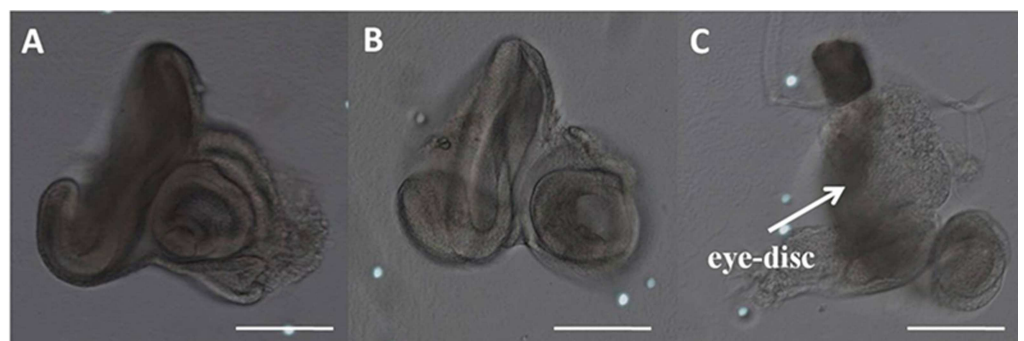

**Fig 5. Third instar eye-antenna discs.** (A): *y w* (B): *UAS-RpPax6* (C): *UAS-RpPax6/ey-GAL4* flies. The boxed areas show growth defects in the eye disc of *UAS-RpPax6/ey-GAL4* larvae. Scale bars = 100 μm.

doi:10.1371/journal.pone.0168579.g005

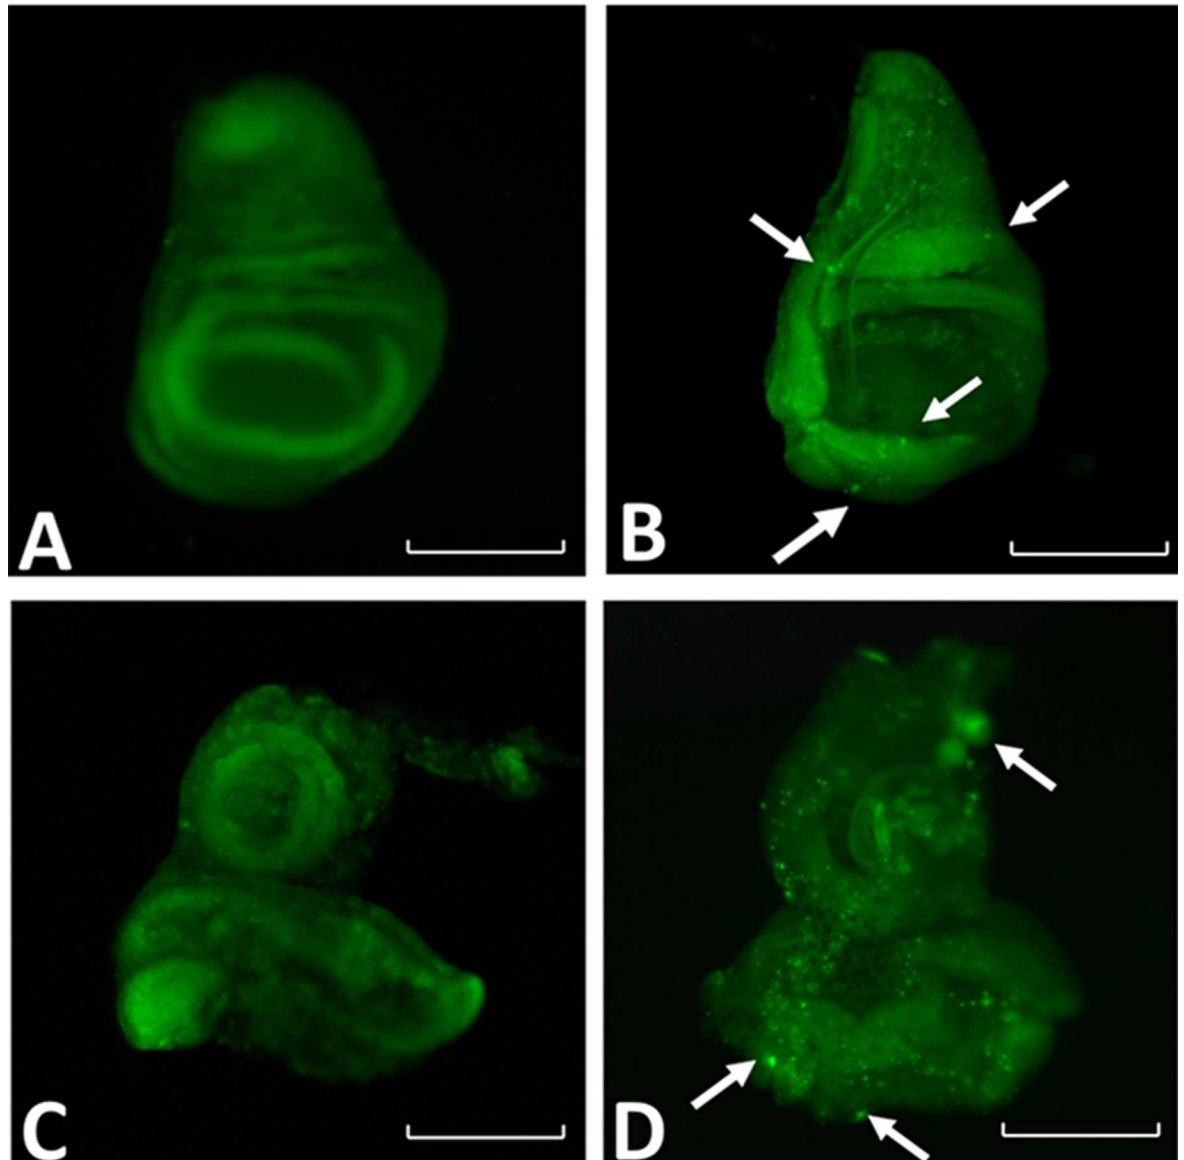

**Fig 6. Expression of *RpPax6* promotes apoptotic cells were identified by acridine orange staining.** Arrow points to a cluster of apoptotic cells. All discs are reproduced at the same magnification. Scale bars = 100  $\mu$ m. (A) Third instar wing disc of *UAS-RpPax6/da-GAL4,tub-GAL80<sup>ts</sup>* reared continuously at 18°C exhibit no cell death as indicated by a lack of nuclear acridine orange staining. (B) Expression of *RpPax6* for 24 h (*UAS-RpPax6/da-GAL4,tub-GAL80<sup>ts</sup>*, shifted to 29°C) lead to cell death in third instar wing disc as indicated by nuclear acridine orange staining (green spots). (C) Third instar of eye-antenna discs of *UAS-RpPax6/da-GAL4,tub-GAL80<sup>ts</sup>* reared continuously at 18°C show a few cell death. (D) Expression of *RpPax6* for 24 h (*UAS-RpPax6/da-GAL4,tub-GAL80<sup>ts</sup>*, shifted to 29°C) lead to high frequency of apoptotic cells in third instar eye-antenna discs.

doi:10.1371/journal.pone.0168579.g006

both discs than those raised continuously reared at 18°C (Fig 6), suggesting *RpPax6* expression causes cell death.

### *RpPax6* can not rescue *ey*<sup>2</sup> mutant

Rescue experiments were set up to assess the importance of the *RpPax6* in vivo. To allow eye-specific expression we used *ey-Gal4* to drive *UAS-ey*, *UAS-mPax6* (mouse *Pax6*) and *UAS-RpPax6* genes in *ey*<sup>2</sup> mutant background. *ey* mutation *ey*<sup>2</sup> is amorphic for *ey* function in the

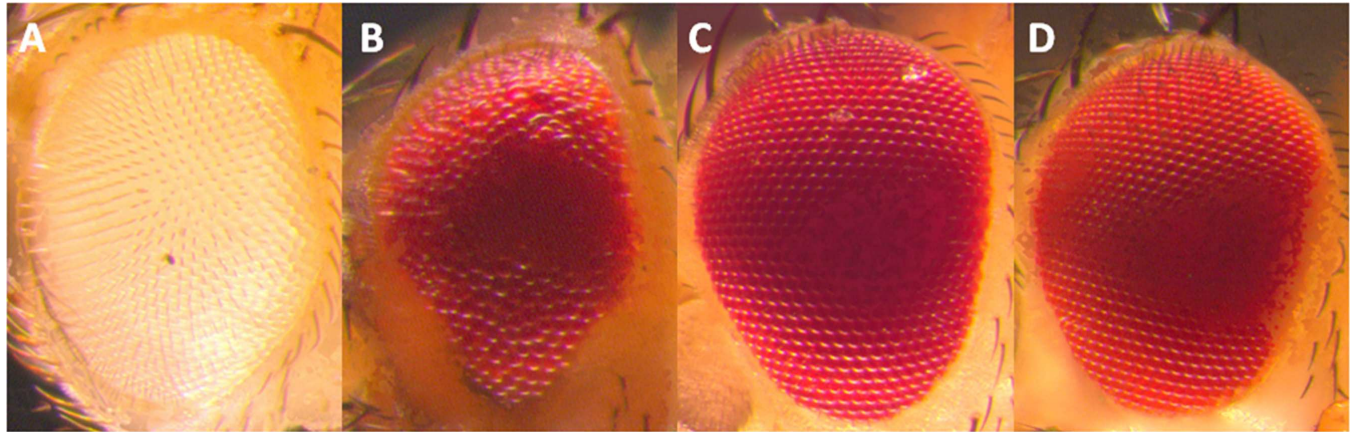

**Fig 7. Mutant rescue by targeted expression of *ey* and *mPax6*.** (A) eye of *y w* fly. The *ey*<sup>2</sup> mutant phenotype (small eye, see Fig B) can be completely rescued by targeted expression of *ey* (C) and *mPax6* (D) driven by *ey*-GAL4.

doi:10.1371/journal.pone.0168579.g007

eye disc. Flies homozygous for *ey*<sup>2</sup> have reduced eyes. Expression of *RpPax6* induced by *ey*-GAL4 in an *ey*<sup>2</sup> mutant background caused pupal lethality. The dead pharates exhibited headless phenotype and the third instar larvae showed abnormal morphology of eye-antennal discs (data not shown), as the condition in *UAS-RpPax6/ey-GAL4* flies. In addition, in the control cross, in which both full-length *ey* and *mPax6* proteins were misexpressed in the same genetic background, the *ey*<sup>2</sup> mutant was fully rescued. The eyes were morphologically normal and often of normal size (Fig 7). The rescue results suggest that *RpPax6* expression can not induce eye development like *ey* and *mPax6* do.

### Inhibition of apoptosis partially rescued *RpPax6*-induced headless phenotype

Our results revealed that flies expressing *RpPax6* with *ey-GAL4* die as pharates showing a headless phenotype (Fig 4D). If the defects are caused by apoptosis, it might be possible to rescue the headless phenotype by inhibition of apoptosis. To test this possibility the effect of a well-characterized anti-apoptotic viral protein P35 that inhibits downstream effector caspases was assessed. Coexpression of *RpPax6* together with P35 with the use of *ey-GAL4* resulted in the suppression of the *RpPax6* induced defects. Although the rescued flies cannot eclose, almost all pharate adults exhibit an eyeless phenotype with most head structures recovered (Fig 8D).

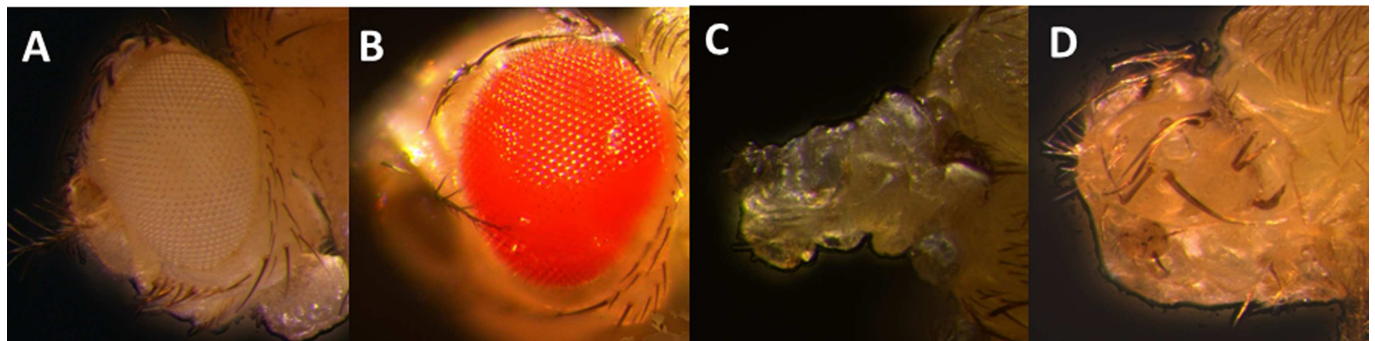

**Fig 8. Eye phenotype caused by expression of *RpPax6* is partially rescued by inhibition of apoptosis (A, B) head of *y w* and *UAS-RpPax6* pharate. (C) *UAS-RpPax6/ey-GAL4* pharate with most head structures and both eyes absent. (D) *UAS-RpPax6/ey-GAL4* pharate headless phenotype can be largely rescued by coexpression of p35, an inhibitor of apoptosis.**

doi:10.1371/journal.pone.0168579.g008



Reduction in the severity of the defect strongly supports a role for caspase-dependent apoptotic cell death in *RpPax6* induced abnormalities.

## Discussion

Covering nearly two-thirds of the Earth's surface, deep-sea regions are known to harbor complex communities with impressively high numbers of species, showing remarkable morphological and physiological adaptations [46–48]. Due to the difficulties in the sampling and preserving of individual specimens, molecular studies of deep-sea organisms are still rare. *R. piscesae* is the foundation species in many Juan de Fuca Ridge hydrothermal vent communities [36, 37] within depths ranging from 1570–3250 m [35, 49–51]. *R. piscesae* is presumed to have lost eyes during evolution because eyes are widespread throughout many annelid taxa [23, 52–54]. Likewise absence of eyes is observed in many species living in ocean depths beyond the penetration of daylight. These blind species might have dispensed with vision due to the lack of selective advantage in a dark environment [55, 56].

*Pax6* play a central role in the core gene regulatory network that governs the development of the eye, a function that is well conserved in both invertebrates and vertebrates. The eye regulatory genes including *ey*, *toy*, *so*, *eya* and *dac* control early eye development in *Drosophila* [57]. *Toy* acts upstream to induce *ey* expression [58, 59]. *Ey* activates expression of *so*, *eya* and *dac* [13, 43, 60]. The latter three are part of a positive feedback loop controlling *ey* expression [61–63] and further regulate more peripheral genes in the eye development network such as *atonal* (*Ato*) [56, 64]. The gene networks have meanwhile also been extended to the respective mammalian proteins [65–67]. Thus *Pax6* proteins (*ey* and *toy*) function upstream in eye gene hierarchies, orchestrating all downstream events. To test if *Pax6* is also involved in eye absence in deep sea organisms, we identified and characterized *Pax6* of *R. piscesae*. Comparison of the deduced amino acid sequence with *Pax6* proteins from other species revealed that two characteristic domains (PD and HD) are highly conserved, indicating selection pressure was exerted due to functional constraints.

*Drosophila Pax6* homolog *ey* has been shown to bind directly to the *so* promoter and activate *so* expression [13]. However, our functional analysis by dual luciferase assay revealed that *RpPax6* can directly target on *so*, not as activator but as repressor. As DNA binding transcription factor, *Pax* genes regulate the development of multiple organs through the utilization of PD and HD combination for target gene promoter recognition [68]. The results (Fig 3) non-conserved C region moiety plays crucial role in the suppression of *so* promoter activity. Previous study has revealed that transactivation domain in *ey* as well as *Pax6* of quail are both located in the c-terminus of the protein [69, 70]. It is possible that the C-terminal moiety of *RpPax6* achieved repression ability either directly or by activation of a repressor. In addition *ey* has been found to be a putative transcriptional repressor. The repressive activity lies in the linker region between paired domain and homeodomain [69]. Our result show *RpPax6* with N-terminal moiety swapped with the corresponding portion of *ey* (*eyN+RpPax6C* and *eyPD+-RpPax6HD*) had little impact on the activity of the *so* promoter (Fig 3), indicating the presence of repressive activity within the N-terminal moiety of *RpPax6*.

The ability to induce ectopic eyes through *Pax6* misexpression has been demonstrated in *Drosophila* and vertebrates [12]. *Pax6* genes of various species including *C. elegans* [71] mouse, *Drosophila* [72], sea squirt [11], squid [10], and lancelet [71] are capable to induce supernumerary eyes upon targeted ectopic expression by means of the GAL4-system in *D. Melanogaster* [8, 10]. While the reciprocal experiment, expression of *Drosophila ey* and its paralog twin of *eyeless* (*toy*) genes in *Xenopus* embryos, induces the development of vertebrate eye structures [73]. Our experiments show flies expression of *UAS-ey* under the control of *dpp-GAL4*

generated many ectopic eye structures on wings, legs and head, in line with previous research [8]. By contrast, none of the *UAS-RpPax6* transgenic lines was able to induce ectopic eye morphogenesis under the same conditions. It is conceivable that *RpPax6* expression cause repression of *so* and lead to the failure to trigger the eye formation process.

To elucidate the role of *RpPax6* in eye developmental cascade, we misexpressed *ey*, *mPax6* and *RpPax6* in an *ey* mutant background. Rescuing the *ey*<sup>2</sup> mutant by *ey* and *mPax6* leads to full recovery of eye size. However, expression of *RpPax6* in the same background is lethal with a lethal phase during the pupal stage, in agreement with the lethal phase of the severe *ey* mutant *eyD*. *eyD* mutants has been described to develop into fully formed headless adults that fail to eclose from their pupal cases (pharate adults) [59]. Interestingly, similar headless phenotypes was also produced in pharates of *RpPax6* expressed *ey*<sup>2</sup> mutant. The *EyD* protein not only lacks the entire homeodomain, but also 660 amino acids in the C-terminus [74] show that overexpression of *ey* can rescue the lethality of homozygous *eyD* mutants and also suppress the *eyD* phenotype and partially restore head development. It has been suggested that the remaining paired domain is be able to bind to the cluster of binding sites within the eye enhancer of *so*, but the modifications in the C-terminus might interfere with normal transcriptional activation. Similarly, our Luciferase reporter assay revealed that *RpPax6* protein suppresses the transcription of *sine oculis* (*so*) and the C-terminal of *RpPax6* plays crucial role in the repressive activity. We postulate that *RpPax6* expression induced by *ey*-GAL4 might interfere with the developmental pathway during eye-antenna disc formation and lead to the headless phenotype.

In *D. melanogaster*, the compound eyes and most head structures (head capsule, antenna, ocelli) develop entirely from the eye-antennal discs [75], in which process *ey* gene is involved in cell proliferation, differentiation and migration/adhesion [76, 77]. The headless phenotype characterized by the lack of structures derived from eye-antennal discs suggests massive cell death during development [56, 78]. As evident from acridine orange staining of *RpPax6* expressed larva and rescue of headless by the expression of the baculovirus P35 protein in eye-antennal discs (Fig 8D), the headless phenotype of *UAS-RpPax6/ey-GAL4* pharates results from the induction of apoptosis by expression of *RpPax6*. Paradoxically, authentic *Pax* genes are associated with differentiation, proliferation and anti-apoptosis during development process [76, 77]. Inhibition of *ey* [58, 79] as well as other *Pax* genes including *Pax2*, *Pax8* [80], *Pax3* and *Pax7* [81] induce apoptosis. Interestingly, *Pax6* is involved in the eye regression of a blind cave form of the teleost *Astyanax mexicanus*. *Pax6* sequence is found to be identical in the eyeless cave form (cavefish) and eyed surface form (surface fish) [82]. However, during embryonic development in cavefish increased expression of *sonic hedgehog* (*Shh*) suppresses *Pax6* and increases expression of *Shh-regulated* genes, which further results in lens apoptosis and eye degeneration. The apoptosis and *Pax6* down regulation are common to several independently derived cavefish populations, suggesting the importance in the evolution of eye degeneration [83–86]. The results of our study indicate that alternation of *Pax6* function may cause the activation of apoptosis and further contribute the blindness in vestimentiferan tube-worms. Fly models provide powerful genetic systems to dissect the role of transcription factor change in developmental evolution. In the present study we have used this tool to provide some initial molecular insights into the mechanisms of transcriptional regulation of *RpPax6*. Further in vivo investigations are necessary to validate the function in the normal context.

## Acknowledgments

We are grateful to Renjie Jiao and the Bloomington Stock Center for fly stocks.



## Author Contributions

**Conceptualization:** JC WW.

**Data curation:** HY CP BH LK.

**Formal analysis:** HY JC.

**Funding acquisition:** JC WW MC.

**Investigation:** HY BH CP.

**Methodology:** JC.

**Project administration:** JC WW.

**Resources:** JC HY MC.

**Software:** BH CP LK LY.

**Supervision:** JC WW.

**Validation:** WW JC.

**Visualization:** HY WW.

**Writing – original draft:** WW HY.

**Writing – review & editing:** JC MC.

## References

1. Blake JA, Ziman MR. Pax genes: regulators of lineage specification and progenitor cell maintenance. *Development*. 2014; 141(4):737–751. doi: [10.1242/dev.091785](https://doi.org/10.1242/dev.091785) PMID: [24496612](https://pubmed.ncbi.nlm.nih.gov/24496612/)
2. Relaix F. Pax genes: Master regulators of development and tissue homeostasis. *Semin Cell Dev Biol*. 2015; 44:62–63.
3. Dahl E, Koseki H, Balling R. Pax genes and organogenesis. *Bioessays*. 1997; 19(9):755–765. doi: [10.1002/bies.950190905](https://doi.org/10.1002/bies.950190905) PMID: [9297966](https://pubmed.ncbi.nlm.nih.gov/9297966/)
4. Gehring WJ, Ikeo K. Pax 6: mastering eye morphogenesis and eye evolution. *Trends Genet*. 1999; 15(9):371–377. PMID: [10461206](https://pubmed.ncbi.nlm.nih.gov/10461206/)
5. Callaerts P, Halder G, Gehring WJ. PAX-6 in development and evolution. *Annu Rev Neuro Sci*. 1997; 20(1):483–532.
6. Hill RE, Favor J, Hogan BL, Ton CC, Saunders GF, Hanson IM, et al. Mouse small eye results from mutations in a paired-like homeobox-containing gene. *Nature*. 1991; 354:522–525. doi: [10.1038/354522a0](https://doi.org/10.1038/354522a0) PMID: [1684639](https://pubmed.ncbi.nlm.nih.gov/1684639/)
7. Walther C, Gruss P. Pax-6, a murine paired box gene, is expressed in the developing CNS. *Development*. 1991; 113(4):1435–1449. PMID: [1687460](https://pubmed.ncbi.nlm.nih.gov/1687460/)
8. Halder G, Callaerts P, Gehring WJ. Induction of ectopic eyes by targeted expression of the eyeless gene in *Drosophila*. *Science*. 1995; 267:1788–1792. PMID: [7892602](https://pubmed.ncbi.nlm.nih.gov/7892602/)
9. Loosli F, Kmita-Cunisse M, Gehring WJ. Isolation of a Pax-6 homolog from the ribbonworm *Lineus sanguineus*. *P Nat Acad Sci USA*. 1996; 93(7):2658–2663.
10. Tomarev SI, Callaerts P, Kos L, Zinovieva R, Halder G, Gehring WJ, et al. Squid Pax-6 and eye development. *P Nat Acad Sci USA*. 1997; 94(6):2421–2426.
11. Glardon S, Callaerts P, Halder G, Gehring WJ. Conservation of Pax-6 in a lower chordate, the ascidian *Phallusia mammilata*. *Development*. 1997; 124(4):817–825. PMID: [9043063](https://pubmed.ncbi.nlm.nih.gov/9043063/)
12. Chow RL, Altmann CR, Lang RA, Hemmati-Brivanlou A. Pax6 induces ectopic eyes in a vertebrate. *Development*. 1999; 126(19):4213–22. PMID: [10477290](https://pubmed.ncbi.nlm.nih.gov/10477290/)
13. Niimi T, Seimiya M, Kloter U. Direct regulatory interaction of the eyeless protein with an eye-specific enhancer in the sine oculis gene during eye induction in *Drosophila*. *Development*. 1999; 126(10):2253–2260. PMID: [10207149](https://pubmed.ncbi.nlm.nih.gov/10207149/)

14. Xu PX, Woo I, Her H. Mouse Eya homologues of the *Drosophila* eyes absent gene require Pax6 for expression in lens and nasal placode. *Development*. 1997; 124(1):219–231. PMID: [9006082](#)
15. Zhang T, Ranade S, Cai CQ. Direct control of neurogenesis by selector factors in the fly eye: regulation of atonal by Ey and So. *Development*. 2006; 133(24):4881–4889. doi: [10.1242/dev.02669](#) PMID: [17108002](#)
16. Riesenberger AN, Le TT, Willardsen MI. Pax6 regulation of Math5 during mouse retinal neurogenesis. *Genesis*. 2009; 47(3):175–187. doi: [10.1002/dvg.20479](#) PMID: [19208436](#)
17. Land MF, Nilsson DE. *Animal Eyes*. New York: Oxford University Press; 2002.
18. Leys SP, Degnan BM. Cytological basis of photoresponsive behavior in a sponge larva. *Biol Bull US*. 2001; 201(3):323–338.
19. Nordström K, Seymour J, Nilsson D. A simple visual system without neurons in jellyfish larvae. *P Roy Soc Lond B Bio*. 2003; 270(1531): 2349–2354.
20. vonDöhren J, Bartolomaeus T. Ultrastructure and development of the rhabdomeric eyes in *Lineus viridis* (Heteronemertea, Nemertea). *Zoology*. 2007; 110(5):430–438. doi: [10.1016/j.zool.2007.07.006](#) PMID: [17913481](#)
21. Brandenburger J, Woolacott R, Eakin R. Fine structure of eyespots in tornarian larvae (Phylum: Hemichordata). *Cell Tissue Res*. 1973; 142(1):89–102.
22. Lacalli TC. Frontal eye circuitry, rostral sensory pathways and brain organization in amphioxus larvae: evidence from 3D reconstructions. *P Roy Soc Lond B Bio*. 1996; 351(1377):243–63.
23. Arendt D, Tessmar K, de Campos-Baptista MI, Dorresteijn A, Wittbrodt J. Development of pigment-cup eyes in the polychaete *Platynereisdumerilii* and evolutionary conservation of larval eyes in bilateria. *Development*. 2002; 129(5):1143–1154. PMID: [11874910](#)
24. Rhode B. Development and differentiation of the eye in *Platynereisdumerilii* (Annelida, Polychaeta). *J Morphol*. 1992; 212(1):71–85.
25. Rhode B. Larval and adult eyes in *Capitella* sp. I (Annelida, Polychaeta). *J Morphol*. 1993; 217(3): 327–335.
26. Bartolomaeus T. Different photoreceptors in juvenile *Ophelia rathkei* (Annelida, Opheliida). *Microfauna Marina*. 1993; 8:99–114.
27. Hermans C, Eakin R. Fine structure of the eyes of an alciopid polychaete, *Vanadistagensis*. *Z. Morphol. J Morphol*. 1974; 79(4):245–267.
28. Yamamoto T, Tasaki K, Sugawara Y. Fine structure of the octopus retina. *J Cell Biol*. 1965; 25(2): 345–359.
29. Hermans CO, Eakin RM. Fine structure of the cerebral ocelli of a sipunculid, *Phascoloso maagassizii*. *Zeitschrift für Zellforschung und mikroskopische Anatomie. Cell Tissue Res*. 1969; 100 (3):325–339.
30. Eakin RM, Westfall JA. Fine structure in the eye of *Peripatus* (Onychophora). *Cell Tissue Res*. 1965; 68(2):278–300.
31. Little CTS, Herrington RJ, Maslennikov VV, Morris NJ, Zaykov VV. Silurian hydrothermal vent community from the southern Urals, Russia. *Nature*. 1997; 385:146–148.
32. Caullery M. Sur les Siboglinidae, type nouveau dinvertkbres receuillis par l'expédition du Siboga. *Cr Acad Bulg Sci*. 1914; 158:2014–2017.
33. McMullin ER, Hourdez S, Schaeffer SW. Phylogeny and biogeography of deep sea vestimentiferan tubeworms and their bacterial symbionts. *Symbiosis*. 2003; 34(1):1–41.
34. Kojima S, Hashimoto T, Hasegawa M, Murata S, Ohta S, Seki H, et al. Close phylogenetic relationship between vestimentifera (tube worms) and annelida revealed by the amino acid sequence of elongation factor- $\alpha$ . *J Mol Evol*. 1993; 37(1):66–70. PMID: [8360920](#)
35. Schulze A. Phylogeny of Vestimentifera (Siboglinidae, Annelida) inferred from morphology. *Zool Scr*. 2003; 32(4):321–342.
36. Tunnicliffe V. The biology of hydrothermal vents: ecology and evolution. *Oceanogr Mar Biol*. 1991; 29:319–407.
37. Urcuyo IA, Massoth GJ, Julian D, Fisher CR. Habitat, growth and physiological ecology of a basaltic community of *Ridgeia piscesae* from the Juan de Fuca Ridge. *Deep-Sea Res Pt I*. 2003; 50(6):763–780.
38. Ruan L, Bian X, Wang X. Molecular characteristics of the tubeworm, *Ridgeia piscesae*, from the deep-sea hydrothermal vent. *Extremophiles*. 2008; 12(5):735–739. doi: [10.1007/s00792-008-0172-8](#) PMID: [18521537](#)
39. Kumar S, Tamura K, Nei M. MEGA3: integrated software for molecular evolutionary genetics analysis and sequence alignment. *Brief Bioinform*. 2004; 5(2):150–163.

40. Zeidler D, Zähringer U, Gerber I, Dubery I, Hartung T, Bors W, et al. Innate immunity in *Arabidopsis thaliana*: lipopolysaccharides activate nitric oxide synthase (NOS) and induce defense genes. *P Nat Acad Sci USA*. 2004; 101(44):15811–15816.
41. Abrams JM, White K, Fessler LI, Steller H. Programmed cell death during *Drosophila* embryogenesis. *Development*. 1993; 117(1):29–43. PMID: [8223253](#)
42. Halder G, Callaerts P, Flister S. Eyeless initiates the expression of both sine oculis and eyes absent during *Drosophila* compound eye development. *Development*. 1998; 125(12): 2181–2191. PMID: [9584118](#)
43. Zimmerman JE, Bui QT, Liu H, et al. Molecular genetic analysis of *Drosophila* eyes absent mutants reveals an eye enhancer element. *Genetics*. 2000; 154(1):237–46. PMID: [10628984](#)
44. Hauck B, Gehring WJ, Walldorf U. Functional analysis of an eye specific enhancer of the eyeless gene in *Drosophila*. *P Nat Acad Sci USA*. 1999; 96(2):564–569.
45. Karim FD, Rubin GM. Ectopic expression of activated ras1 induces hyperplastic growth and increased cell death in *Drosophila* imaginal tissues. *Development*. 1998; 125(1):1–9. PMID: [9389658](#)
46. Gage JD, Tyler PA. Deep-sea biology: a natural history of organisms at the deep-sea floor. Cambridge: Cambridge University Press; 1991.
47. Herring P. The biology of the deep ocean. Oxford: Oxford University Press; 2002.
48. Rex MA. Community structure in the deep-sea benthos. *Annu Rev Ecol Syst*. 1981; 12:331–353.
49. Jones ML. On the Vestimentifera, new phylum: six new species, and other taxa, from hydrothermal vents and elsewhere. *P Biol Soc Wash*. 1985; 6:117–185.
50. Tunncliffe V, McArthur AG, McHugh D. A biogeographical perspective of the deep-sea hydrothermal vent fauna. *Adv Mar Biol*. 1998; 34:353–442.
51. Nyholm SV, Robidart J, Girguis PR. Coupling metabolite flux to transcriptomics: insights into the molecular mechanisms underlying primary productivity by the hydrothermal vent tubeworm *Ridgeia piscesae*. *Biol Bull US*. 2008; 214(3):255–265.
52. Purschke G, Arendt D, Hausen H, Müller MC. Photoreceptor cells and eyes in Annelida. *Arthropod Struct Dev*. 2006; 35(4):211–230. doi: [10.1016/j.asd.2006.07.005](#) PMID: [18089072](#)
53. Suschenko D, Purschke G. Ultrastructure of pigmented adult eyes in errant polychaetes (Annelida): Implications for annelid evolution. *Zoomorphology*. 2009; 128(1):75–96.
54. Purschke G, Nowak KH. Ultrastructure of pigmented eyes in Dorvilleidae (Annelida, Errantia, Eunicida) and their importance for understanding the evolution of eyes in polychaetes. *Acta Zool Stockholm*. 2015; 96(1):67–81.
55. Raupach MJ, Mayer C, Malyutina M. Multiple origins of deep-sea Asellota (Crustacea: Isopoda) from shallow waters revealed by molecular data. *P Roy Soc B Biol Sci*. 2009; 276 (1658):799–808.
56. Warrant E. Vision in the dimmest habitats on earth. *J Comp Physiol A*. 2004; 190(10):765–789.
57. Friedrich M. Ancient mechanisms of visual sense organ development based on comparison of the gene networks controlling larval eye, ocellus, and compound eye specification in *Drosophila*. *Arthropod Struct Dev*. 2006; 35(4):357–378. doi: [10.1016/j.asd.2006.08.010](#) PMID: [18089081](#)
58. Czerny T, Halder G, Kloter U, Souabni A, Gehring WJ, Busslinger M. Twin of eyeless, a second Pax-6 gene of *Drosophila*, acts upstream of eyeless in the control of eye development. *Mol Cell*. 1999; 3 (3):297–307. PMID: [10198632](#)
59. Kronhamn J, Frei E, Daube M. Headless flies produced by mutations in the paralogous *Pax6* genes eyeless and twin of eyeless. *Development*. 2002; 129(4):1015–1026. PMID: [11861484](#)
60. Punzo C, Kurata S, Gehring WJ. The eyeless homeodomain is dispensable for eye development in *Drosophila*. *Gene Dev*. 2001; 15(13):1716–1723. doi: [10.1101/gad.196401](#) PMID: [11445545](#)
61. Chen R, Amoui M, Zhang Z, Mardon G. Dachshund and eyes absent proteins form a complex and function synergistically to induce ectopic eye development in *Drosophila*. *Cell*. 1997; 91(7):893–903. PMID: [9428513](#)
62. Pignoni F, Hu B, Zavitz KH, Xiao J, Garrity PA, Zipursky SL. The eye-specification proteins So and Eya form a complex and regulate multiple steps in *Drosophila* eye development. *Cell*. 1997; 91(7):881–891. PMID: [9428512](#)
63. Pauli T, Seimiya M, Blanco J, Gehring WJ. Identification of functional sine oculis motifs in the autoregulatory element of its own gene, in the eyeless enhancer and in the signalling gene hedgehog. *Development*. 2005; 132(12):2771–2782. doi: [10.1242/dev.01841](#) PMID: [15901665](#)
64. Lynch VJ, Wagner GP. Revisiting a classic example of transcription factor functional equivalence: are Eyeless and Pax6 functionally equivalent or divergent? *J Eep Zool Part B*. 2011; 316(2):93–98.

65. Heanue TA, Reshef R, Davis RJ, Mardon G, Oliver G, Tomarev S, et al. Synergistic regulation of vertebrate muscle development by Dach2, Eya2, and Six1, homologs of genes required for *Drosophila* eye formation. *Gene Dev.* 1999; 13(24):3231–3243. PMID: [10617572](#)
66. Ikeda K, Watanabe Y, Ohto H, Kawakami K. Molecular interaction and synergistic activation of a promoter by Six, Eya, and Dach proteins mediated through CREB binding protein. *Mol Cell Biol.* 2002; 22(19):6759–6766. doi: [10.1128/MCB.22.19.6759-6766.2002](#) PMID: [12215533](#)
67. Ohto H, Kamada S, Tago K, Tominaga SI, Ozaki H, Sato S, et al. Cooperation of six and eya in activation of their target genes through nuclear translocation of Eya. *Mol Cell Biol.* 1999; 19(10):6815–6824. PMID: [10490620](#)
68. Buckingham M, Relaix F. The role of Pax genes in the development of tissues and organs: Pax3 and Pax7 regulate muscle progenitor cell functions. *Annu Rev Cell Dev Bi.* 2007; 23(1):645–673.
69. Weasner BM, Weasner B, DeYoung SM, Michaels SD, Kumar JP. Transcriptional activities of the Pax6 gene *eyeless* regulate tissue specificity of ectopic eye formation in *Drosophila*. *Dev Biol.* 2009; 334(2):492–502. doi: [10.1016/j.ydbio.2009.04.027](#) PMID: [19406113](#)
70. Gehring WJ. New perspectives on eye development and the evolution of eyes and photoreceptors. *J Hered.* 2005; 96(3):171–184. doi: [10.1093/jhered/esi027](#) PMID: [15653558](#)
71. Carriere C, Plaza S, Caboche J, Dozier C, Bailly M, Martin P. Nuclear localization signals, DNA binding, and transactivation properties of quail Pax-6 (Pax-QNR) isoforms. *Cell Growth Differ.* 1995; 6(12):1531–1540. PMID: [9019158](#)
72. Lionakis MS, Lewis RE, May GS, Wiederhold NP, Albert ND, Halder G, Kontoyiannis DP. Toll-deficient *Drosophila* flies as a fast, high-throughput model for the study of antifungal drug efficacy against invasive aspergillosis and *Aspergillus* virulence. *J Infect Dis.* 2005; 191(7):1188–95. doi: [10.1086/428587](#) PMID: [15747256](#)
73. Onuma Y, Takahashi S, asashima M, Kurata S, Gehring WJ. Conservation of Pax 6 function and upstream activation by Notch signaling in eye development of frogs and flies. *P Nat Acad Sci USA.* 2002; 99(4):2020–2025.
74. Jacobsson L, Kronhamn J, Rasmuson-Lestander Å. The *Drosophila* Pax6 paralogs have different functions in head development but can partially substitute for each other. *Mol Genet Genomics.* 2009; 282(3):217–231. doi: [10.1007/s00438-009-0458-2](#) PMID: [19484263](#)
75. Jordanova A, Irobi J, Thomas FP. Disrupted function and axonal distribution of mutant tyrosyl-Trna synthetase in dominant intermediate Charcot-Marie-Tooth neuropathy. *Nat Genet.* 2006; 38(2):197–202. doi: [10.1038/ng1727](#) PMID: [16429158](#)
76. van Heyningen V, Williamson KA. PAX6 in sensory development. *Hum Mol Genet.* 2002; 11(10):1161–1167. PMID: [12015275](#)
77. Morante J, Erclik T, Desplan C. Cell migration in *Drosophila* optic lobe neurons is controlled by *eyeless*/Pax6. *Development.* 2011; 138(4):687–693. doi: [10.1242/dev.056069](#) PMID: [21208993](#)
78. Punzo C, Plaza S, Seimiya M, Schnupf P, Kurata S, Jaeger J, et al. Functional divergence between *eyeless* and twin of *eyeless* in *Drosophila melanogaster*. *Development.* 2004; 131:3943–3953. doi: [10.1242/dev.01278](#) PMID: [15253940](#)
79. Halder G, Callaerts P, Flister S. *Eyeless* initiates the expression of both *sine oculis* and *eyes absent* during *Drosophila* compound eye development. *Development.* 1998; 125(12):2181–2191. PMID: [9584118](#)
80. Bouchard M, Souabni A, Mandler M, Neubüser A, Busslinger M. Nephric lineage specification by Pax2 and Pax8. *Genes Dev.* 2002; 16(22):2958–2970. doi: [10.1101/gad.240102](#) PMID: [12435636](#)
81. Relaix F, Rocancourt D, Mansouri A. A Pax3/Pax7-dependent population of skeletal muscle progenitor cells. *Nature.* 2005; 435(7044):948–953. doi: [10.1038/nature03594](#) PMID: [15843801](#)
82. Behrens M, Langecker TG, Wilkens H, Schmale H. Comparative analysis of Pax-6 sequence and expression in the eye development of the blind cave fish *Astyanax fasciatus* and its epigeal conspecific. *Mol Biol Evol.* 1997; 14(3):299–308. PMID: [9066797](#)
83. Jeffery WR, Martasian DP. Evolution of eye regression in the cavefish *Astyanax*: apoptosis and the Pax-6 gene. *Am Zool.* 1998; 38(4):685–696.
84. Jeffery WR, Strickler AG, Yamamoto Y. To see or not to see: Evolution of eye degeneration in Mexican blind cavefish. *Integr Comp Biol.* 2003; 43(4):531–541.
85. Jeffery WR. Adaptive evolution of eye degeneration in the Mexican blind cavefish. *J Hered.* 2005; 96(3):185–196. doi: [10.1093/jhered/esi028](#) PMID: [15653557](#)
86. Yamamoto Y, Jeffery WR. Probing teleost eye development by lens transplantation. *Methods.* 2002; 28(4):420–426. PMID: [12507460](#)
